# Supplementary material
Source: PubMed Central journal article supplement (PMC10244330)
Supplement: 41541_2023_683_MOESM1_ESM.pdf [file 41541_2023_683_MOESM1_ESM.pdf]

1 Mapping human norovirus antigens during infection reveals the breadth of the humoral  
2 immune response

3

4 Lynn Su, Wanzhi Huang, Frederick H. Neill, Mary K. Estes, Robert L. Atmar and  
5 Timothy Palzkill

7

8 **Supplementary Figure 1.** Schematic of HuNoV genomic phage library construction.

9 **Supplementary Figure 2.** Deep sequencing analysis of the inserts present in the NoV Jun-Fos  
10 library before and after affinity selection versus day 14-30 post-infection sera.

11 **Supplementary Figure 3.** In-frame fraction analysis of NoV Jun-Fos library versus post-  
12 infection sera before and after affinity selection.

13 **Supplementary Figure 4.** Alignment of peptides with high coverage after two rounds of affinity  
14 selection with sera of subject 715.

15 **Supplementary Figure 5.** Deep sequencing analysis of the inserts present in the GII.4 HOV  
16 Jun-Fos library before and after affinity selection versus GII.4 antisera.

17 **Supplementary Figure 6.** In-frame fraction analysis of GII.4 HOV Jun-Fos library before and  
18 after affinity selection versus GII.4 antisera.

19 **Supplementary Figure 7.** Deep sequencing analysis of the inserts present in the GII.4 HOV  
20 Jun-Fos library before and after affinity selection versus GII.4 antisera.

21 **Supplementary Figure 8.** Dendrogram of GII.4 HOV epitope profiles.

22 **Supplementary Figure 9.** Alignment of epitope sequences of GI.1 Norwalk to that of GII.4  
23 HOV.

24 **Supplementary Table 1.** List of epitopes from all the sera identified after two rounds of affinity  
25 selections with the NoV Jun-Fos library.

26 **Supplementary Table 2.** List of epitopes from all the sera identified after two rounds of affinity  
27 selections with the GII.4 HOV Jun-Fos library.

28

29

30

31

32

33

34

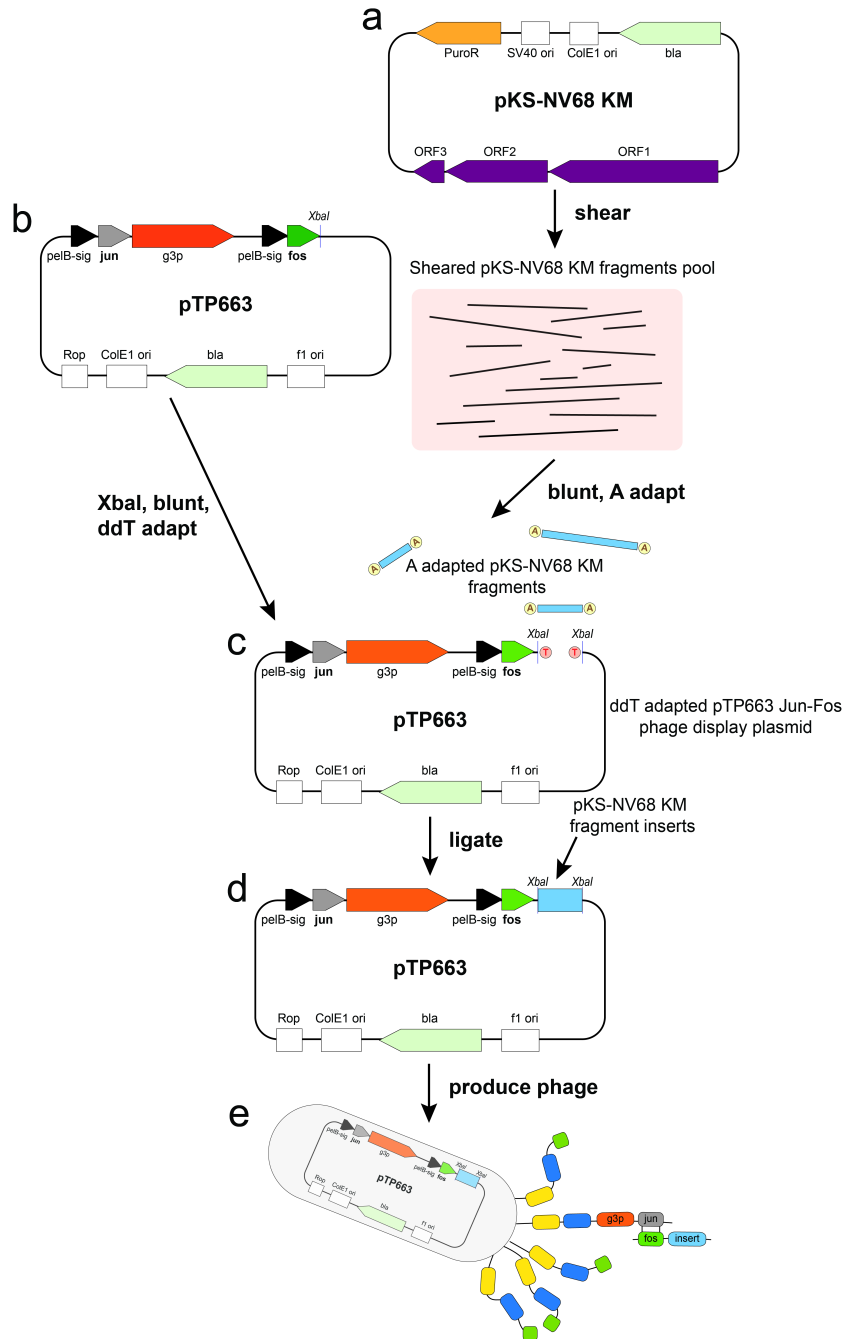

35

36 **Supplementary Figure 1.** Schematic of HuNoV genomic phage library construction. **a**  
 37 Schematic illustration of pKS-NV68 KM plasmid, which contains the GI.1 open reading frames  
 38 (ORFs) as indicated in purple, that was sheared to construct the HuNoV phage library. Since  
 39 the entire plasmid was sheared, the library contains inserts from all regions of the plasmid in  
 40 addition to ORFs 1 to 3. **b** Schematic illustration of the pTP663 Jun-Fos phage display plasmid.  
 41 **c** Sheared DNA of 100 to 500 bp was adapted with A. **d** The pTP663 plasmid was digested with  
 42 XbaI, the ends were adapted with T, and the fragments were ligated with the A-adapted sheared  
 43 DNA to form the library. **e** The library clones were transformed into *E. coli*, pooled, and helper  
 44 phage was added to propagate phages for the phage library to be used for affinity selection.

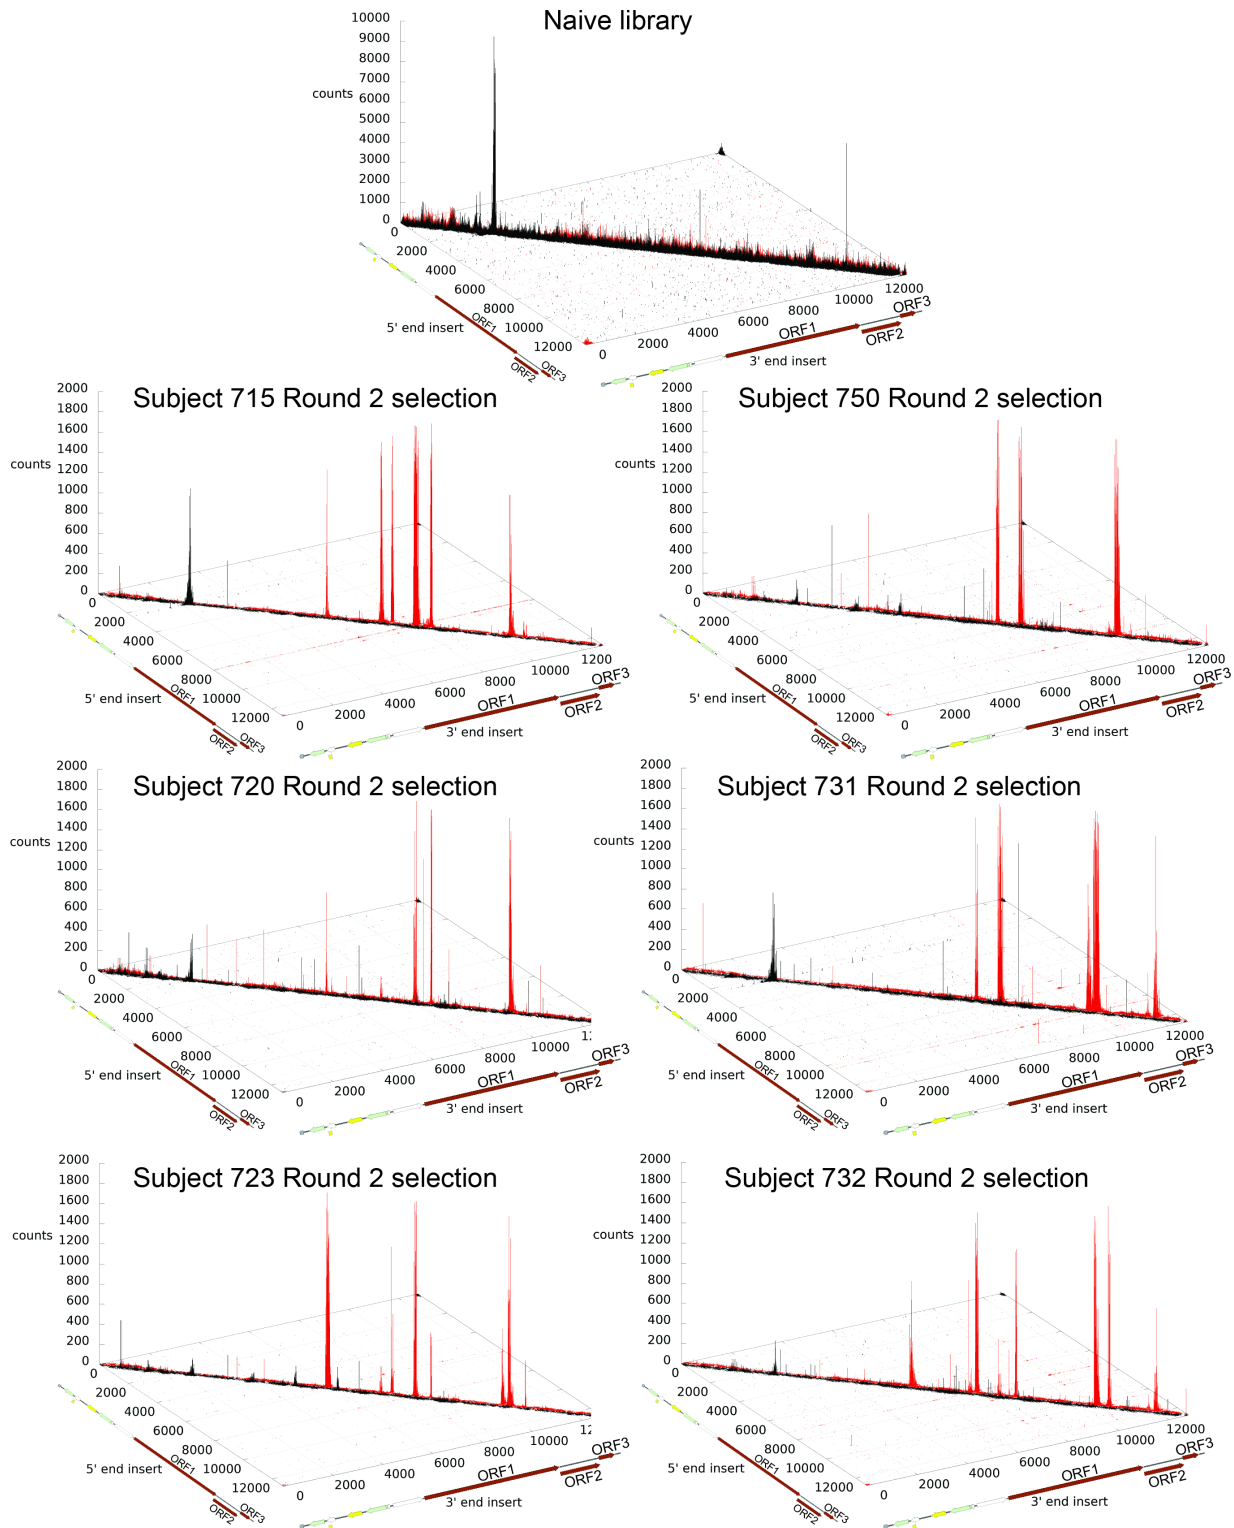

45

46 **Supplementary Figure 2.** Deep sequencing analysis of the inserts present in the NoV Jun-Fos  
 47 library before and after affinity selection versus day 14-30 post-infection sera. Distribution of  
 48 inserts after two rounds of affinity selection with sera of subjects 715, 720, 723, 750, 731, and  
 49 732.

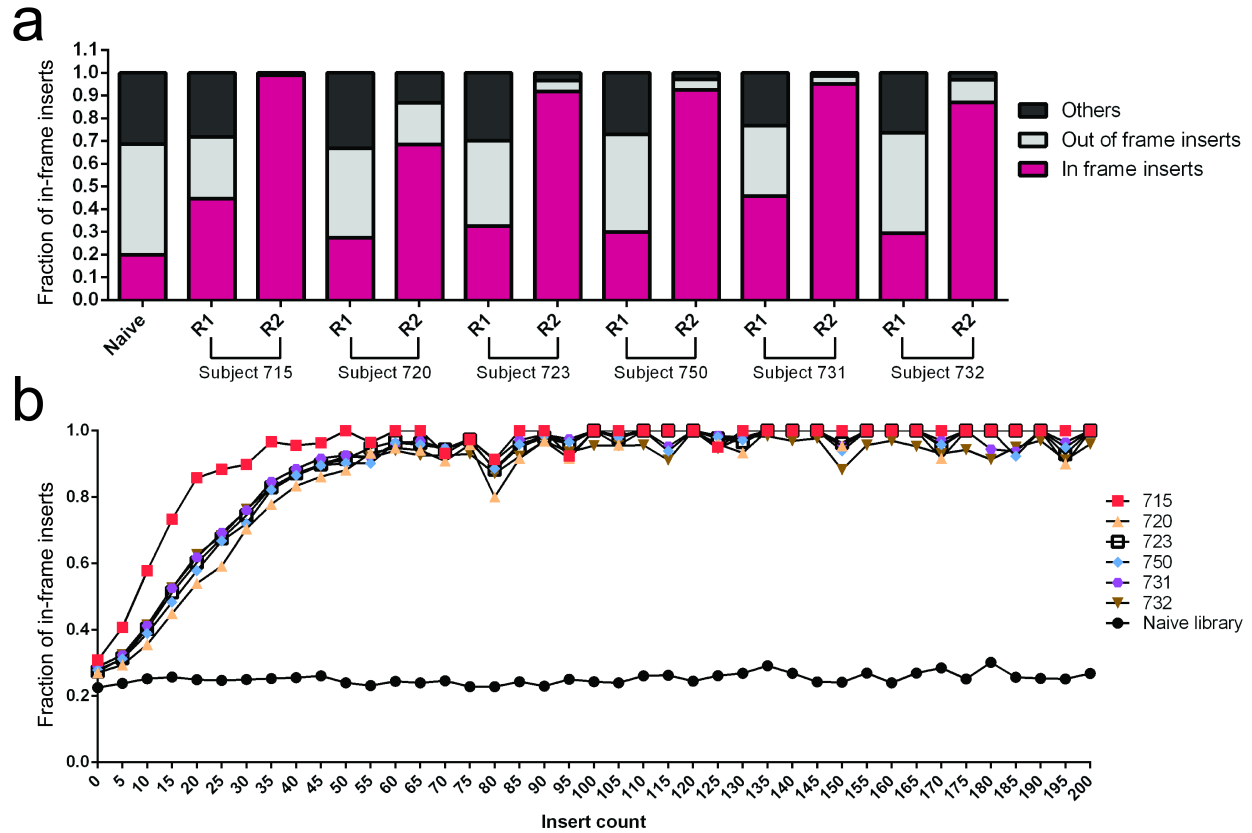

50

51 **Supplementary Figure 3.** In-frame fraction analysis of NoV Jun-Fos library versus post-  
 52 infection sera before and after affinity selection. **a** The fraction of all the in-frame inserts in the  
 53 naïve library and each round of affinity selection with subjects 715, 720, 723, 750, 731, and 732  
 54 sera. The fraction of the in-frame inserts is shown on the y-axis while the naïve library and the  
 55 individual sera names are shown on the x-axis. The fraction of the inserts that are in-frame to  
 56 the HuNoV ORFs are shown in magenta while the fraction of the out-of-frame inserts and the  
 57 inserts that are not within HuNoV ORFs are shown in gray and black, respectively. The fraction  
 58 of the in-frame inserts was determined by dividing the number of in-frame inserts by the total  
 59 number of inserts in that experiment. **b** The fraction of in-frame reads for each insert count  
 60 group in the naïve library and the libraries after the second round of affinity selection. The  
 61 fraction of in-frame inserts is shown on the y-axis while the insert count groups are shown on  
 62 the x-axis. The fraction of the in-frame inserts per insert count group is determined by dividing  
 63 the number of in-frame inserts by the total number of inserts in that insert count group.

64

65

66

67

68

69



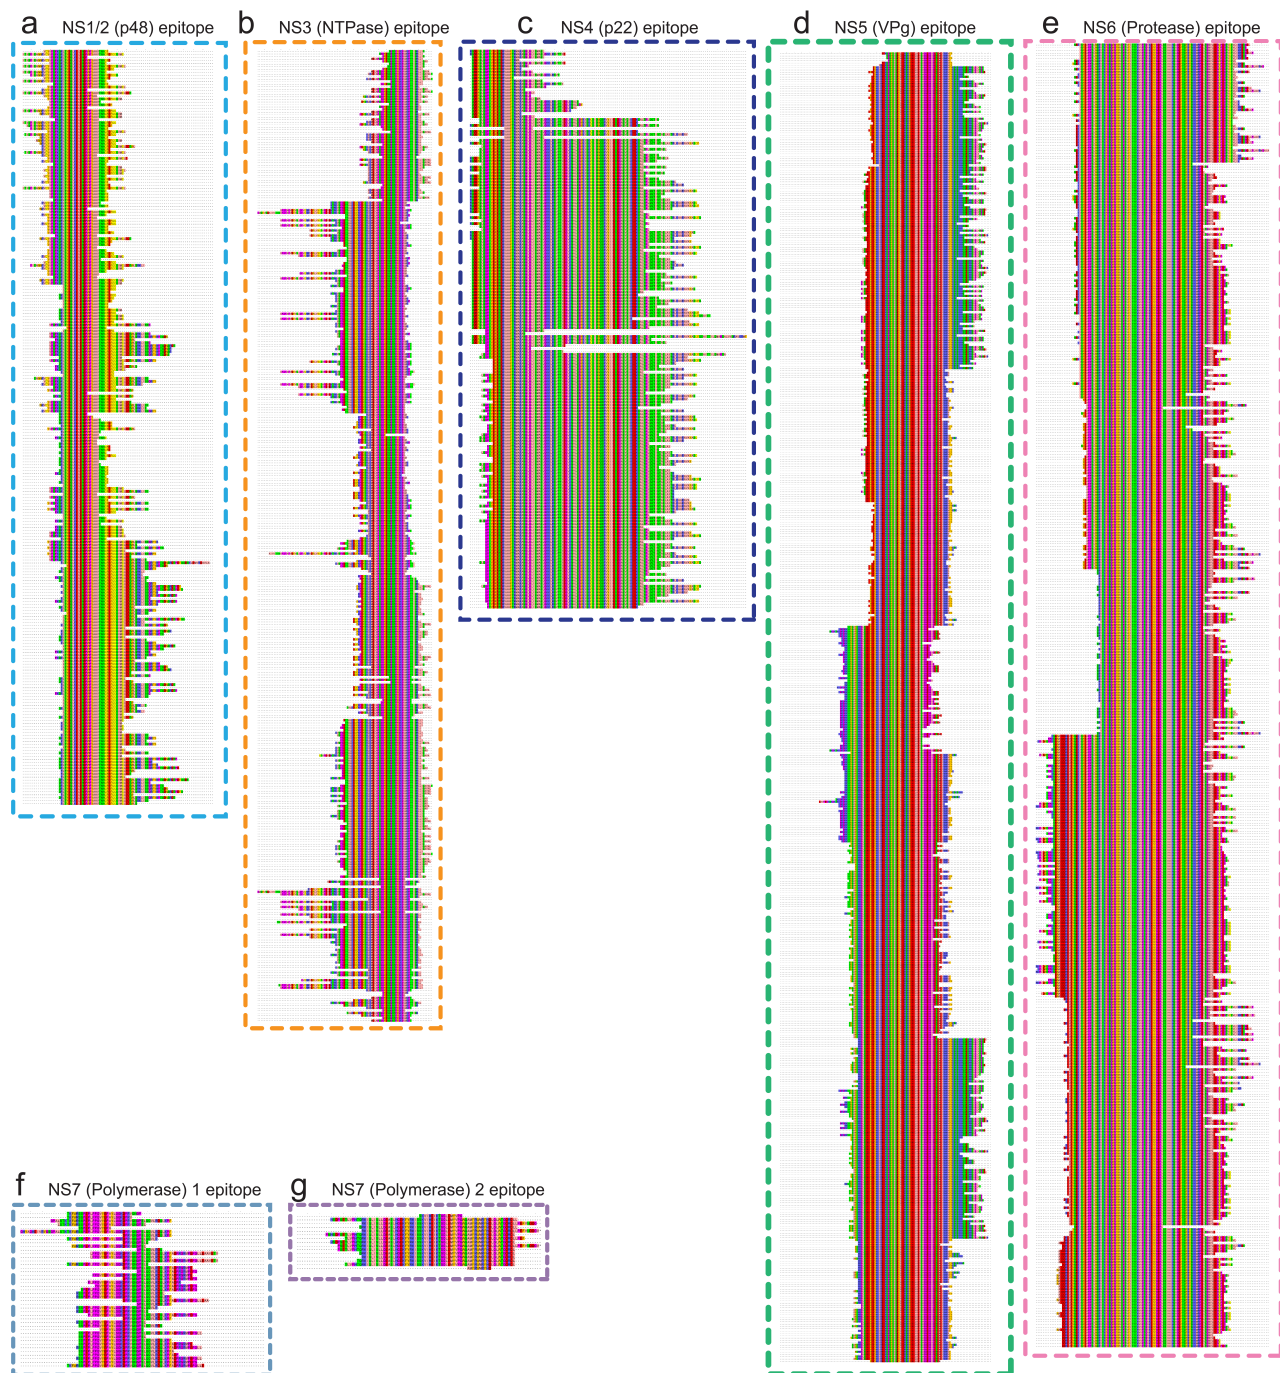

70

71 **Supplementary Figure 4.** Alignment of peptides with high coverage after two rounds of affinity  
 72 selection with sera of subject 715. The numbering at the top indicates the amino acid residue  
 73 positions in the nonstructural proteins. The Jalview Zappo color scheme is used, in which  
 74 aliphatic/hydrophobic residues (I, L, V, A, and M) are peach, aromatic residues (F, W, and Y)  
 75 are gold, positively charged residues (K, R, and H) are blue, negatively charged residues (D and  
 76 E) are red, hydrophilic residues (S, T, N, and Q) are green, conformationally special residues (G  
 77 and P) are magenta, and cysteine is yellow. The peptide alignments define the anti-GI.1  
 78 nonstructural protein epitopes in **a** NS1/2 (p48), **b** NS3 (NTPase), **c** NS4 (p22), **d** NS5 (VPg), **e**  
 79 NS6 (protease), and **(f, g)** NS7 (RdRp).

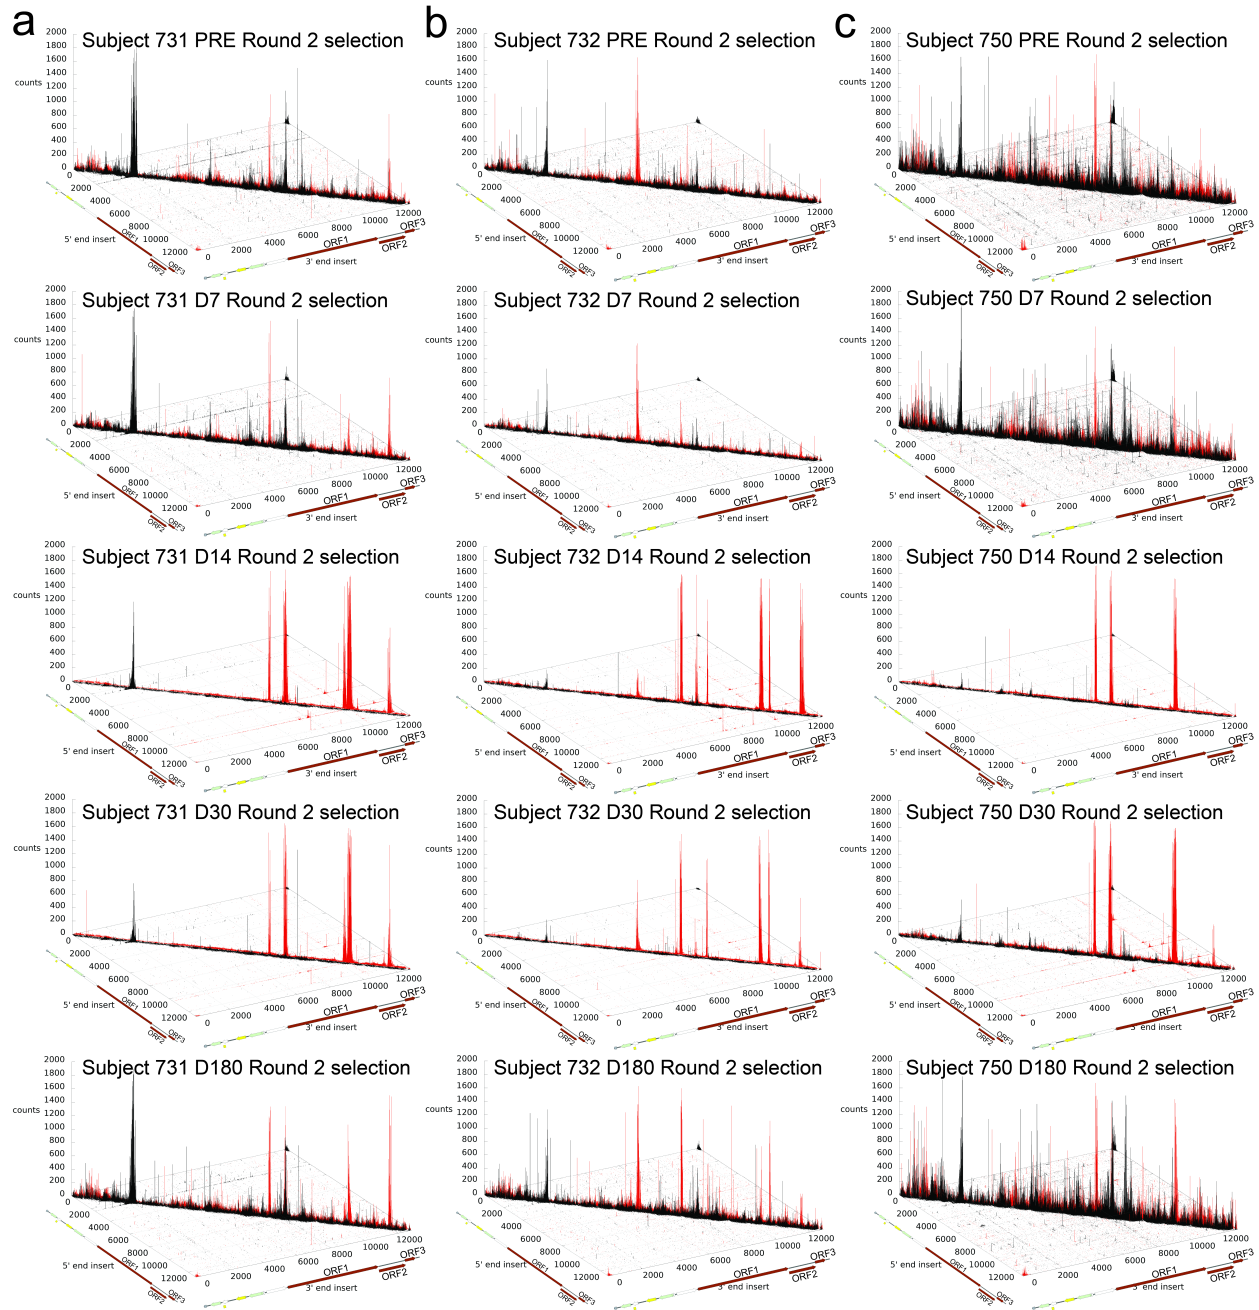

80

81 **Supplementary Figure 5.** Deep sequencing analysis of the inserts present in the HuNoV Jun-  
 82 Fos library before and after affinity selection versus pre- and post-infection sera. **a** Distribution  
 83 of inserts after two rounds of affinity selection with subject 731 sera before challenge, 7 days  
 84 after challenge, 14 days after challenge, 30 days after challenge, and 180 days after challenge.  
 85 **b** The distribution of inserts after two rounds of affinity selection with subject 732 sera before  
 86 challenge, 7 days after challenge, 14 days after challenge, 30 days after challenge, and 180  
 87 days after challenge. **c** The distribution of inserts after round 2 of affinity selection with subject  
 88 750 sera before challenge, 7 days after challenge, 14 days after challenge, 30 days after  
 89 challenge, and 180 days after challenge.

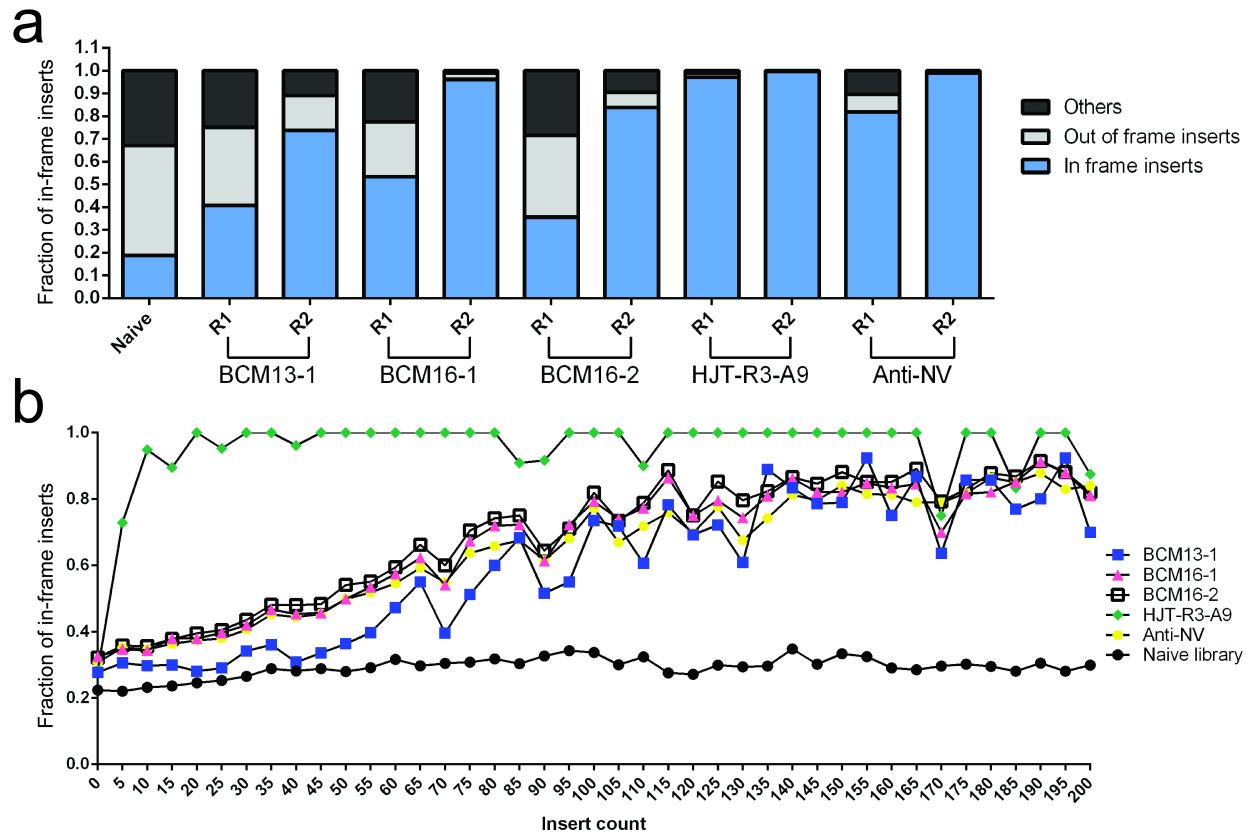

90

91 **Supplementary Figure 6.** In-frame fraction analysis of GII.4 HOV Jun-Fos library before and  
 92 after affinity selection versus GII.4 antisera. **a** The fraction of all the in-frame inserts in the naïve  
 93 library and each round of affinity selection with subjects BCM16-1, BCM13-1, and BCM16-2  
 94 sera, HJT-R3-A9 antibody, and Anti-NV. The fraction of the in-frame inserts is shown on the y-  
 95 axis while the naïve library and the individual sera names are shown on the x-axis. The fraction  
 96 of the inserts that are in-frame to the HuNoV ORFs are shown in blue while the fraction of the  
 97 out-of-frame inserts and the inserts that are not within HuNoV ORFs are shown in gray and  
 98 black, respectively. The fraction of the in-frame inserts is determined by dividing the number of  
 99 in-frame inserts by the total number of inserts in that experiment. **b** The fraction of in-frame  
 100 reads for each insert count group in the naïve library and the libraries after affinity selections.  
 101 The fraction of in-frame inserts is shown on the y-axis while the insert count groups are shown  
 102 on the x-axis. The fraction of the in-frame inserts per insert count group is determined by  
 103 dividing the number of in-frame inserts by the total number of inserts in that insert count group.

104

105

106

107

108

109

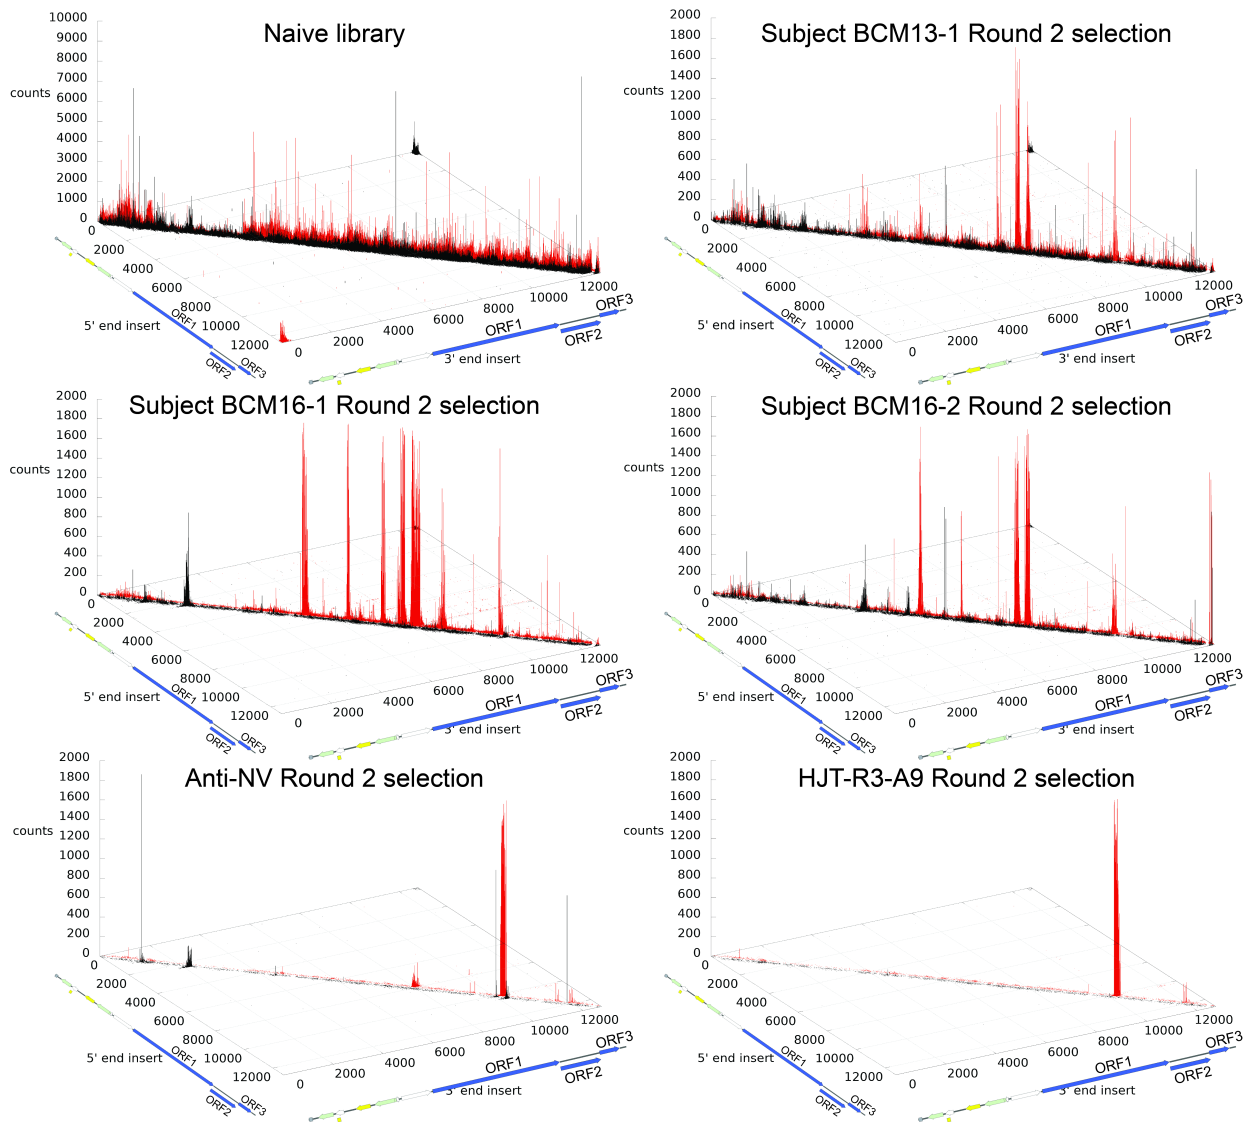

110

111 **Supplementary Figure 7.** Deep sequencing analysis of the inserts present in the GII.4 HOV  
 112 Jun-Fos library before and after affinity selection versus GII.4 antisera. Distribution of inserts  
 113 after two rounds of affinity selection with BCM16-1 sera, BCM13-1 sera, BCM16-2 sera, anti-NV  
 114 rabbit polyclonal antibodies, HJT-R3-A9 scFv antibody.

115

116

117

118

119

120

121



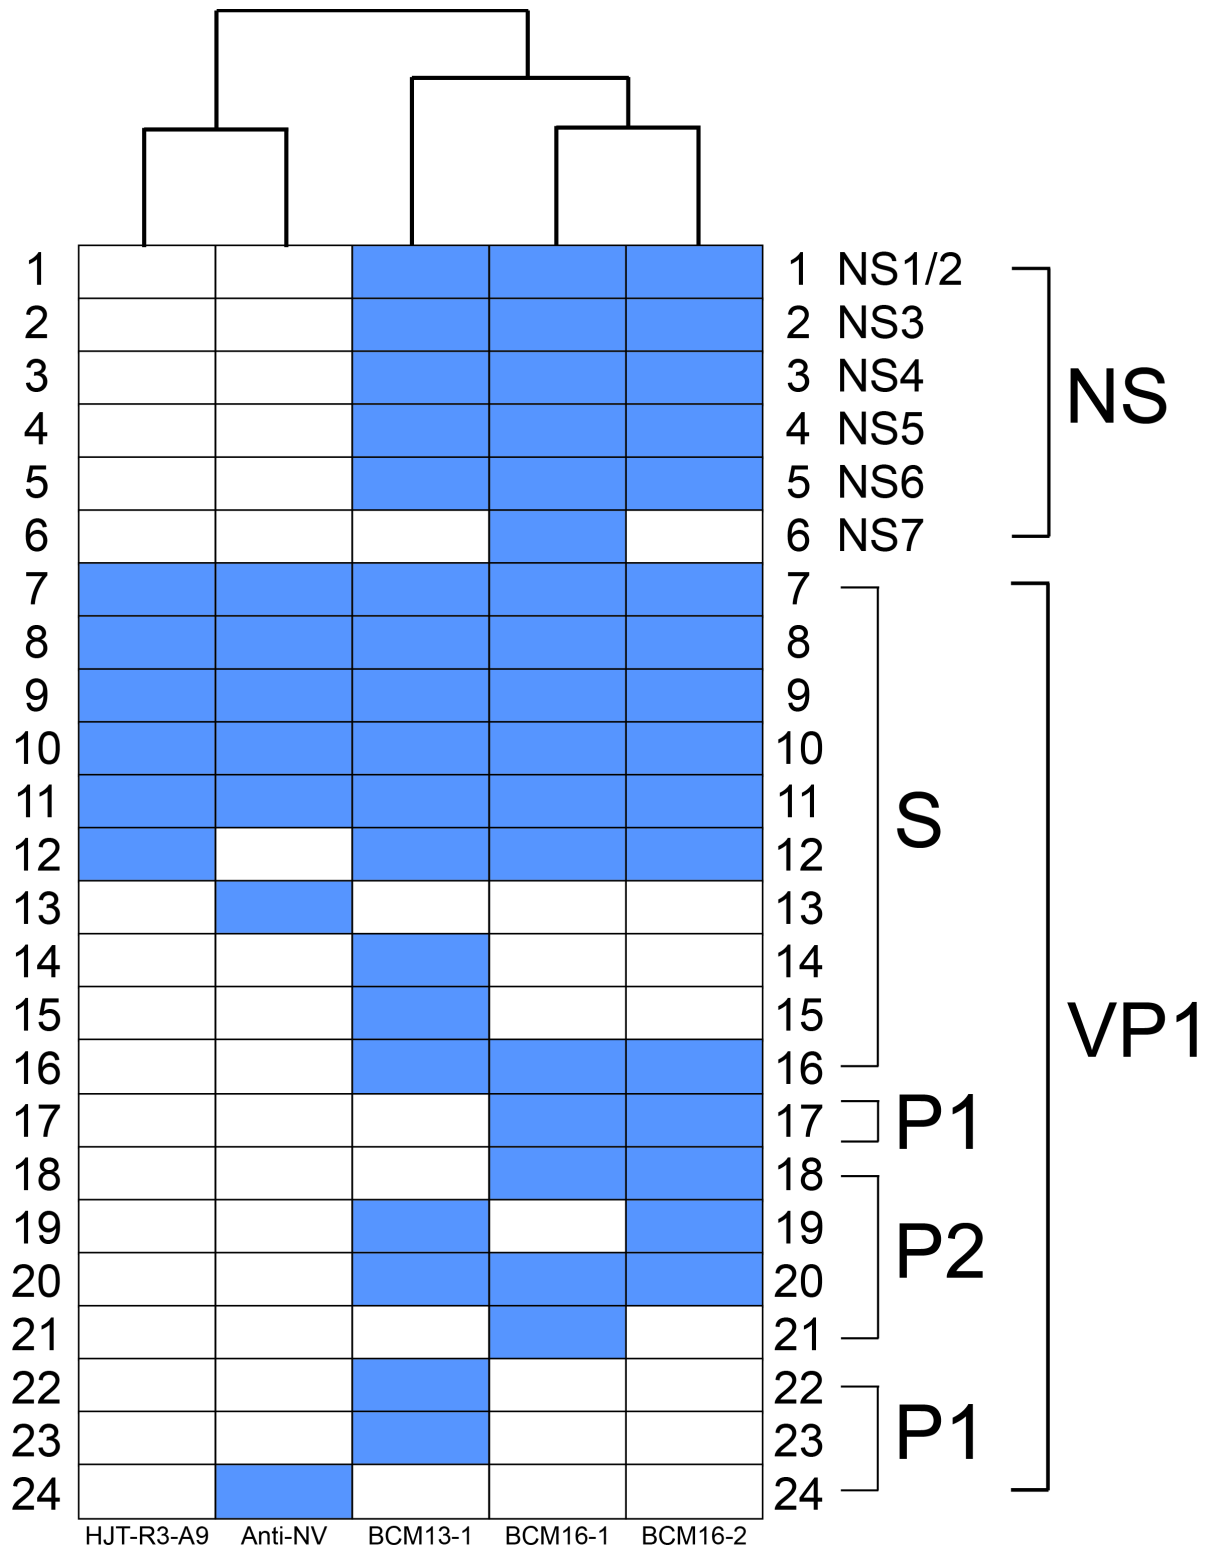

122

123 **Supplementary Figure 8.** Dendrogram of GII.4 HOV epitope profiles. A dendrogram comparing  
 124 the epitope profiles shared among the four sera and HJT-R3-A9 scFv antibody. Blue blocks  
 125 indicate the epitope that an individual has in the specified nonstructural or structural protein  
 126 domain.

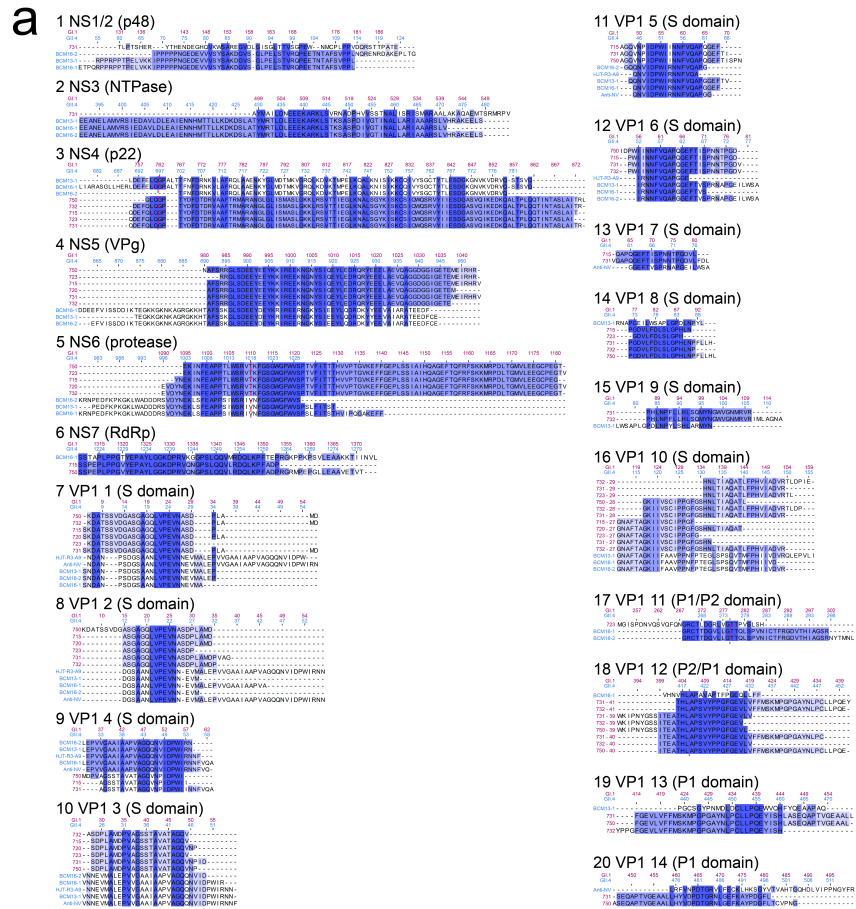

127

128 **Supplementary Figure 9.** Alignment of epitope sequences of GI.1 Norwalk to that of GII.4  
 129 HOV. **a** Jalview Percent Identity (PID) is used to align sequences from GI.1 Norwalk and GII.4  
 130 HOV and visualize the percent identity the sequences share. The numbering at the top indicates  
 131 the amino acid residue positions in the corresponding nonstructural and structural proteins. GI.1  
 132 Norwalk positions are shown in red while the GII.4 HOV positions are shown in blue. The  
 133 leftmost column indicates the name of the sera or antibody while the different shades of purple  
 134 indicate the percent identity in the alignments. Percent identity is calculated according to the  
 135 percentage of the residues in each column that match the consensus sequence. The darkest  
 136 shade purple indicates 80% conservation between the GI.1 Norwalk and GII.4 HOV sequences.  
 137 The next lighter grade of purple indicates 60%, and 40% and 20% for the subsequently lighter  
 138 shades. **b** The NCBI Multiple Sequence Alignment Viewer (MSA) is used to calculate the  
 139 percent identity between the GI.1 Norwalk and GII.4 HOV epitope sequences. Percent identity is  
 140 calculated as the number of matches in an alignment row relative to the alignment length, where  
 141 the alignment length is the aligned sequence minus any gaps for all other alignments.



|                      | HUT-R3-A9 epitope sequence                              | HUT-R3-A9 epitope position | BCM131 epitope sequence                                                                                              | BCM131 epitope position | BCM161 epitope sequence                                                                                                          | BCM161 epitope position | BCM162 epitope sequence                                                                                      | BCM161 epitope position | Anti-NV epitope sequence | Anti-NV epitope position | shared epitope sequence                                                                                    | shared epitope position | epitope length | shared among |
|----------------------|---------------------------------------------------------|----------------------------|----------------------------------------------------------------------------------------------------------------------|-------------------------|----------------------------------------------------------------------------------------------------------------------------------|-------------------------|--------------------------------------------------------------------------------------------------------------|-------------------------|--------------------------|--------------------------|------------------------------------------------------------------------------------------------------------|-------------------------|----------------|--------------|
| 11-p48               |                                                         |                            | RPPRRPPELVKVKI<br>PPPPPPNGEDEVV<br>SYSAKDGVSGLPE<br>LSTVQKQREINTAF<br>SVVPL                                          | 55 131                  | ETQPPRRPPE<br>LVKQPPPPNGED<br>EVVYSYAKDGV<br>QLPELSTVQKQ<br>TNTAFSVVPL                                                           | 51 113                  | IPPPPPNGEDEVV<br>SYSAKDGVSGLPE<br>LSTVQKQREINTAF<br>SVVPLAKQREKDA<br>KEPLTG                                  | 68 127                  |                          |                          | IPPPPPNGEDEVV<br>SYSAKDGVSGLPE<br>LSTVQKQREINTAF<br>SVVPL                                                  | 68 113                  | 46             | 3            |
| 22-NTPase            |                                                         |                            | EEANELAMVRSIED<br>AVLDLEANNHMT<br>TLKDKDSLATYM<br>RTLDEEEKARKLS<br>TKSASPDVGTINA<br>LLARIAAARSLVHR<br>AKEELS         | 395 483                 | EEANELAMVRSIED<br>AVLDLEANNHMT<br>TLKDKDSLATYM<br>RTLDEEEKARKLS<br>TKSASPDVGTINA<br>LLARIAAARSLV<br>AKEELS                       | 395 475                 | EEANELAMVRSIED<br>AVLDLEANNHMT<br>TLKDKDSLATYM<br>RTLDEEEKARKLS<br>TKSASPDVGTINA<br>LLARIAAARSLVHR<br>AKEELS | 395 483                 |                          |                          | EEANELAMVRSIED<br>AVLDLEANNHMT<br>TLKDKDSLATYM<br>RTLDEEEKARKLS<br>TKSASPDVGTINA<br>LLARIAAARSLV<br>AKEELS | 395 475                 | 81             | 3            |
| 33-p22               |                                                         |                            | LDEFELQGPALTTF<br>NDRKVLAFRQL<br>AAENKVLMDTKM<br>VGRQLKDKTPEL<br>LQKALNSIKKQCV<br>VSGCTYLESDD<br>KGNVQVDRVQSTS<br>VG | 690 785                 | LJARRASGLERLED<br>EFELOGPALTTF<br>DRKVLAFRQLAA<br>ENYGLMDTKM<br>GRQLKDKTPEL<br>KQALNSIKKQCV<br>VSGCTYLESDD<br>KGNVQVDRVQSTS<br>Q | 678 785                 | TFNDRKVLAFR<br>QLAAENKVLMDT<br>MKVGRQLKDKVT<br>MPELQKALNSIK<br>KQCVVSGCTYTL<br>ESDGKGNVQVDRV<br>Q            | 702 780                 |                          |                          | TFNDRKVLAFR<br>QLAAENKVLMDT<br>MKVGRQLKDKVT<br>MPELQKALNSIK<br>KQCVVSGCTYTL<br>ESDGKGNVQVDRV<br>Q          | 702 779                 | 78             | 3            |
| 44-VFq               |                                                         |                            | TEGKGGKKNKAGR<br>GKQHTAFSSKGLS<br>DEEYDEYKRRRE<br>RNGKYSIESYLOD<br>RDKYEEVAIARAT<br>EEDFCE                           | 874 944                 | DEEYVSSDQIKT<br>EGKGGKKNKAGR<br>KKHTAFSSKGLS<br>EYDEYKRRRE<br>RNGKYSIESYLOD<br>DKYEEVAIARAT<br>EEDF                              | 861 942                 | EFVSSDQIKTEK<br>KGNKAGRGKQHT<br>AFSSKGLSDEEYD<br>EYKRRREERNKY<br>SIEEYLODRKYY<br>EEVAIARATEDFC<br>E          | 864 944                 |                          |                          | TEGKGGKKNKAGR<br>GKQHTAFSSKGLS<br>DEEYDEYKRRRE<br>RNGKYSIESYLOD<br>RDKYEEVAIARAT<br>EEDF                   | 872 942                 | 69             | 3            |
| 55-protease          |                                                         |                            | PEDFKPGKGLWAD<br>DDRSVDYNEKLSF<br>EAPPSWRSVNFV<br>SGWGFVWSPSLFI<br>TST                                               | 982 1037                | KRNFEDEFKPGKGL<br>WADDORSVDYNE<br>KLSFEAPPSWRS<br>VNFVSGWGFVW<br>PSLFTSTHVIPOG<br>AKEFF                                          | 979 1048                | KRNFEDEFKPGKGL<br>WADDORSVDYNE<br>KLSFEAPPSWRS<br>VNFVSGWGFVWVS                                              | 979 1029                |                          |                          | PEDFKPGKGLWAD<br>DDRSVDYNEKLSF<br>EAPPSWRSVNFV<br>SGWGFVWVS                                                | 982 1029                | 48             | 3            |
| 66-RdRp              |                                                         |                            |                                                                                                                      |                         | SSTAPLPPGTYP<br>AYLGGDKPRRKG<br>GRSLGQVIRDLQ<br>KPFTEPRGKPKPK<br>SVLEAAKKTINVL                                                   | 1220 1283               |                                                                                                              |                         |                          |                          | SSTAPLPPGTYP<br>AYLGGDKPRRKG<br>GRSLGQVIRDLQ<br>KPFTEPRGKPKPK<br>SVLEAAKKTINVL                             | 1220 1283               | 64             | 1            |
| 71-VP1 (S domain)    | NDANPSDGSAAAL<br>VPEVNEVALEP<br>VVGAAIAPVAGQ<br>QNVDFW  | 6 51                       | SNDANPSDGSAAAN<br>LVPEVNEVMALE<br>P                                                                                  | 5 31                    | SNDANPSDGSAAAN<br>LVPEVNEVMA<br>P                                                                                                | 5 31                    | SNDANPSDGSAAAN<br>LVPEVNEVMA                                                                                 | 5 28                    |                          |                          | NDANPSDGSAAAL<br>VPEVNEVALEP<br>VVGAAIAPVAGQ<br>QNVDFW                                                     | 6 51                    | 26             | 5            |
| 82-VP1 (S domain)    | DGSAANLVPEVNN<br>EVMALPEVVGAA<br>AFAAGQGVNDPW<br>IRNN   | 12 55                      | DGSAANLVPEVNN<br>EVM                                                                                                 | 12 27                   | DGSAANLVPEVNN<br>EVM                                                                                                             | 12 27                   | DGSAANLVPEVNN<br>EVM                                                                                         | 12 27                   |                          |                          | DGSAANLVPEVNN<br>EVMALPEVVGAA<br>AFAAGQGVNDPW<br>IRNN                                                      | 12 55                   | 12             | 5            |
| 93-VP1 (S domain)    | VNEVMALPEVVG<br>AAIAPVAGQGVND<br>PWIRNN                 | 23 55                      | VNEVMALPEVVG<br>AAIAPVAGQGVND<br>PWIRNN                                                                              | 22 55                   | VNEVMALPEVVG<br>AAIAPVAGQGVND<br>PWIRNN                                                                                          | 22 53                   | VNEVMALPEVVG<br>AAIAPVAGQGVND<br>PWIRNN                                                                      | 22 49                   |                          |                          | VNEVMALPEVVG<br>AAIAPVAGQGVND<br>PWIRNN                                                                    | 22 56                   | 23             | 5            |
| 104-VP1 (S domain)   | EPVVGAAIAPVA<br>GQGVNDPWIRNN<br>F                       | 30 56                      | EPVVGAAIAPVA<br>GQGVNDPWIRNN<br>F                                                                                    | 29 54                   | EPVVGAAIAPVA<br>GQGVNDPWIRNN<br>F                                                                                                | 29 59                   | EPVVGAAIAPVA<br>GQGVNDPWIRNN<br>F                                                                            | 29 54                   |                          |                          | EPVVGAAIAPVA<br>GQGVNDPWIRNN<br>F                                                                          | 30 58                   | 25             | 5            |
| 115-VP1 (S domain)   | QNVDFWIRNFW<br>QA                                       | 45 69                      | QNVDFWIRNFW<br>QA                                                                                                    | 44 66                   | QNVDFWIRNFW<br>QA                                                                                                                | 45 64                   | QNVDFWIRNFW<br>QA                                                                                            | 43 61                   |                          |                          | QNVDFWIRNFW<br>QA                                                                                          | 45 62                   | 15             | 5            |
| 126-VP1 (S domain)   | IRNFWQAPGGE                                             | 52 63                      | IRNFWQAPGGE                                                                                                          | 52 79                   | IRNFWQAPGGE<br>TVS                                                                                                               | 52 67                   | IRNFWQAPGGE<br>TVS                                                                                           | 52 79                   |                          |                          | IRNFWQAPGGE                                                                                                | 52 63                   | 12             | 4            |
| 137-VP1 (S domain)   |                                                         |                            |                                                                                                                      |                         |                                                                                                                                  |                         |                                                                                                              |                         | GGEFTVSPRNAPG<br>EILWSA  | 61 79                    |                                                                                                            | 61 79                   | 19             | 1            |
| 148-VP1 (S domain)   | RNAPGELWSPAL<br>GRPLV                                   | 69 89                      | RNAPGELWSPAL<br>GRPLV                                                                                                | 69 89                   |                                                                                                                                  |                         |                                                                                                              |                         |                          |                          | RNAPGELWSPAL<br>GRPLV                                                                                      | 69 89                   | 21             | 2            |
| 159-VP1 (S domain)   | LWSARLGPDLNPFY<br>LSHARMYN                              | 76 97                      | LWSARLGPDLNPFY<br>LSHARMYN                                                                                           | 76 97                   |                                                                                                                                  |                         |                                                                                                              |                         |                          |                          | LWSARLGPDLNPFY<br>LSHARMYN                                                                                 | 76 97                   | 22             | 1            |
| 1610-VP1 (S domain)  | GNAFTAGKIFAAV<br>PRNPFTEGLSPSQ<br>VTMPFHIVDRQL<br>EPVLI | 111 156                    | GNAFTAGKIFAAV<br>PRNPFTEGLSPSQ<br>VTMPFHIVD                                                                          | 111 147                 | GNAFTAGKIFAAV<br>PRNPFTEGLSPSQ<br>VTMPFHIVDR                                                                                     | 111 147                 | GNAFTAGKIFAAV<br>PRNPFTEGLSPSQ<br>VTMPFHIVDR                                                                 | 111 149                 |                          |                          | GNAFTAGKIFAAV<br>PRNPFTEGLSPSQ<br>VTMPFHIVD                                                                | 111 147                 | 37             | 4            |
| 1711-VP1 (P1 domain) | GRCTTDGVLGGTT<br>QLSPNCTFRGDV<br>THAGSR                 | 264 297                    | GRCTTDGVLGGTT<br>QLSPNCTFRGDV<br>THAGSR                                                                              | 264 297                 | GRCTTDGVLGGTT<br>QLSPNCTFRGDV<br>THAGSR                                                                                          | 264 297                 | GRCTTDGVLGGTT<br>QLSPNCTFRGDV<br>THAGSR                                                                      | 264 303                 |                          |                          | GRCTTDGVLGGTT<br>QLSPNCTFRGDV<br>THAGSR                                                                    | 264 297                 | 34             | 2            |
| 1812-VP1 (P2 domain) | NNVDPTEIPAPLG<br>TPDFVQKQGLLT<br>QTTKGDGSTRGHK<br>AT    | 309 350                    | NNVDPTEIPAPLG<br>TPDFVQKQGLLT<br>QTTKGDGSTRGHK<br>AT                                                                 | 309 350                 | NNVDPTEIPAPLG<br>TPDFVQKQGLLT<br>QTTKGDGSTRGHK<br>AT                                                                             | 309 350                 | NNVDPTEIPAPLG<br>TPDFVQKQGLLT<br>QTTKGDGSTRGHK<br>AT                                                         | 309 348                 |                          |                          | NNVDPTEIPAPLG<br>TPDFVQKQGLLT<br>QTTKGDGSTRGHK<br>AT                                                       | 309 348                 | 40             | 2            |
| 1913-VP1 (P2 domain) | TQITKGDGSTRGHK<br>KATVYTGSAF                            | 335 357                    | TQITKGDGSTRGHK<br>KATVYTGSAF                                                                                         | 335 357                 | TQITKGDGSTRGHK<br>KATVYTGSAF                                                                                                     | 335 357                 | TQITKGDGSTRGHK<br>KATVYTGSAF                                                                                 | 335 357                 |                          |                          | TQITKGDGSTRGHK<br>KATVYTGSAF                                                                               | 335 357                 | 23             | 2            |
| 2014-VP1 (P2 domain) | TKGDGSTRGHKAT<br>VYTGSAFTPKLGS                          | 338 364                    | TKGDGSTRGHKAT<br>VYTGSAFTPKLGS                                                                                       | 338 364                 | TKGDGSTRGHKAT<br>VYTGSAFTPKLGS                                                                                                   | 338 364                 | TKGDGSTRGHKAT<br>VYTGSAFTPKLGS                                                                               | 338 364                 |                          |                          | TKGDGSTRGHKAT<br>VYTGSAFTPKLGS                                                                             | 338 364                 | 27             | 3            |
| 2115-VP1 (P2 domain) | VHNVHLAPAVAPTF<br>PGEQLLFF                              | 413 434                    | VHNVHLAPAVAPTF<br>PGEQLLFF                                                                                           | 413 434                 | VHNVHLAPAVAPTF<br>PGEQLLFF                                                                                                       | 413 434                 | VHNVHLAPAVAPTF<br>PGEQLLFF                                                                                   | 413 434                 |                          |                          | VHNVHLAPAVAPTF<br>PGEQLLFF                                                                                 | 413 434                 | 22             | 1            |
| 2216-VP1 (P1 domain) | PCSGYPRMIDL<br>CLLPQEWVQHFY<br>GEAAPAQ                  | 439 469                    | PCSGYPRMIDL<br>CLLPQEWVQHFY<br>GEAAPAQ                                                                               | 439 469                 | PCSGYPRMIDL<br>CLLPQEWVQHFY<br>GEAAPAQ                                                                                           | 439 469                 | PCSGYPRMIDL<br>CLLPQEWVQHFY<br>GEAAPAQ                                                                       | 439 469                 |                          |                          | PCSGYPRMIDL<br>CLLPQEWVQHFY<br>GEAAPAQ                                                                     | 439 469                 | 31             | 1            |
| 2317-VP1 (P1 domain) | PNMIDCLLPQEW<br>VQHFYGEAAPAQ<br>DVALLR                  | 445 476                    | PNMIDCLLPQEW<br>VQHFYGEAAPAQ<br>DVALLR                                                                               | 445 476                 | PNMIDCLLPQEW<br>VQHFYGEAAPAQ<br>DVALLR                                                                                           | 445 476                 | PNMIDCLLPQEW<br>VQHFYGEAAPAQ<br>DVALLR                                                                       | 445 476                 |                          |                          | PNMIDCLLPQEW<br>VQHFYGEAAPAQ<br>DVALLR                                                                     | 445 476                 | 32             | 1            |
| 2418-VP1 (P1 domain) | LRFVNPDTGRVLF<br>ECKLHKSQVTV<br>HTGQHDLVPPNG<br>VYR     | 475 516                    | LRFVNPDTGRVLF<br>ECKLHKSQVTV<br>HTGQHDLVPPNG<br>VYR                                                                  | 475 516                 | LRFVNPDTGRVLF<br>ECKLHKSQVTV<br>HTGQHDLVPPNG<br>VYR                                                                              | 475 516                 | LRFVNPDTGRVLF<br>ECKLHKSQVTV<br>HTGQHDLVPPNG<br>VYR                                                          | 475 516                 |                          |                          | LRFVNPDTGRVLF<br>ECKLHKSQVTV<br>HTGQHDLVPPNG<br>VYR                                                        | 475 516                 | 42             | 1            |

149

150

151

152

153

154

155

156

157

158

159

160

161

162

**Supplementary Table 2.** List of epitopes from all the sera identified after two rounds of affinity selections with the GII.4 HOV Jun-Fos library. A total of 24 unique epitopes were identified. The sequences and the positions in the GII.4 HOV ORF1 and ORF2 genome of each epitope are included. The shared epitopes amongst the six individuals as well as the epitopes' sequences, positions in the GII.4 HOV genome, length, and the number of sera that contain the epitopes are also included.
